# Supplementary material for: Deficiency of innate-like T lymphocytes in chronic obstructive pulmonary disease
Source: Springer Nature journal article supplement (doi:10.1186/s12931-017-0671-1), 2017-11-28
Supplement: MOESM1 [file 15262254]

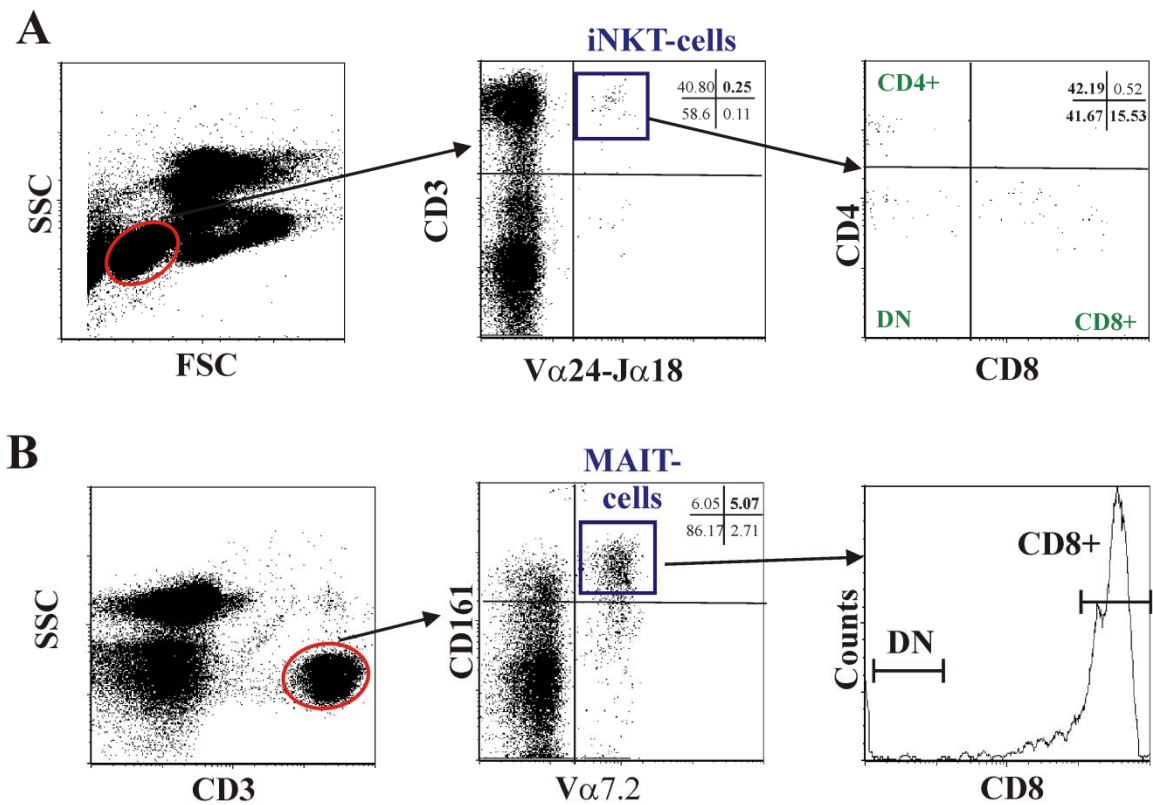

**Fig. S1.** Representative flow cytometry dot plots reveal the gating strategy to identify iNKT cells and their DN, CD4+, CD8+ subsets (A). Representative flow cytometry dot plots and a histogram demonstrate the gating strategy to identify MAIT cells and their DN, CD8+ subsets (B).
