# Supplementary material for: Deficiency of innate-like T lymphocytes in chronic obstructive pulmonary disease
Source: Springer Nature journal article supplement (doi:10.1186/s12931-017-0671-1), 2017-11-28
Supplement: MOESM3 [file 15262254]

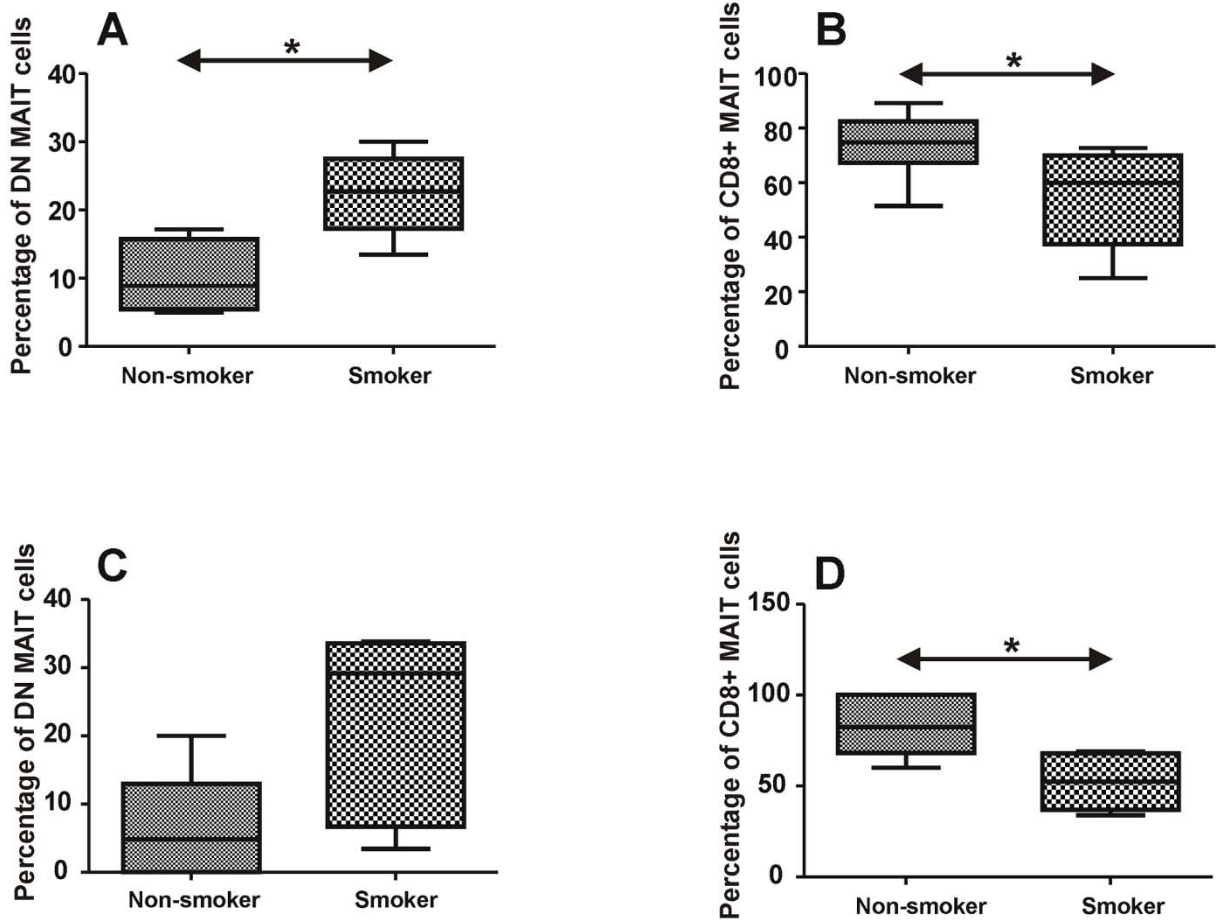

**Fig. S3.** Percentages of DN (A) and CD8+ (B) MAIT cells were evaluated in the peripheral blood of non-smoker and smoker populations in stable COPD patient cohort. Data present here were derived from six non-smoker and five smoker stable COPD blood donors. Percentages of DN (C) and CD8+ (D) MAIT cells were measured in the peripheral blood of non-smoker and smoker populations in the AECOPD patient cohort. Data present here were derived from five non-smoker and five smoker AECOPD blood donors. Boxes show interquartile ranges (IQR) whiskers represent lowest and highest values, horizontal lines indicate median. Asterisks represent significant  $p$  ( $* < 0.05$ ) values.
