# Supplementary material for: Deficiency of innate-like T lymphocytes in chronic obstructive pulmonary disease
Source: Springer Nature journal article supplement (doi:10.1186/s12931-017-0671-1), 2017-11-28
Supplement: MOESM4 [file 15262254]

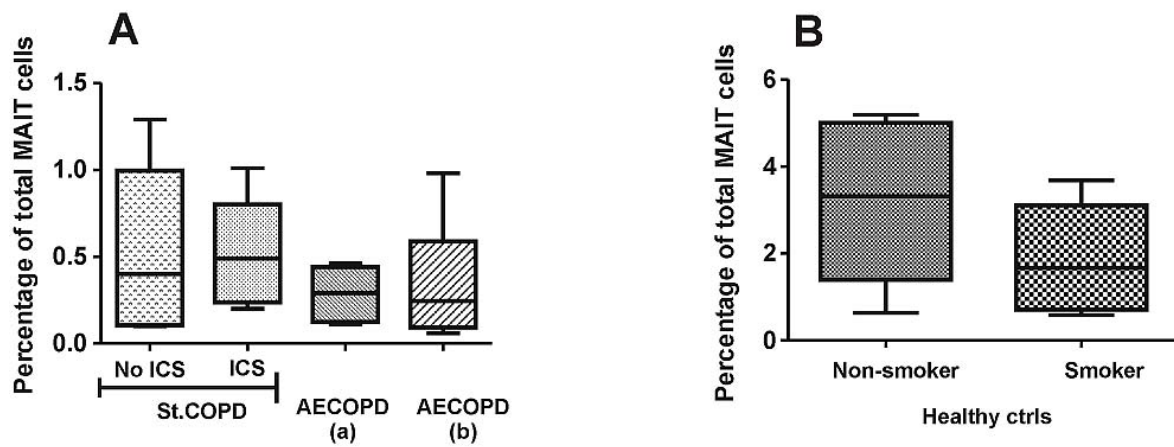

**Fig. S4.** Percentages of total MAIT cells were evaluated in the peripheral blood of inhaled corticosteroid treated (ICS) or non-treated (No ICS) stable COPD and AECOPD patients (**A**). Data present here were derived from five/six stable COPD patients under no ICS/ICS therapy, and ten AECOPD blood donors all receiving ICS therapy.

Percentages of total MAIT cells were measured in the peripheral blood of non-smoker and smoker populations of healthy controls (**B**). Data present here were derived from eleven non-smoker and five smoker healthy control blood donors. Boxes show interquartile ranges (IQR) whiskers represent lowest and highest values, horizontal lines indicate median. Asterisks represent significant  $p$  ( $* < 0.05$ ) values.
